# Supplementary material for: NET-GE: a novel NETwork-based Gene Enrichment for detecting biological processes associated to Mendelian diseases
Source: PubMed Central journal article supplement (PMC4480278; doi:10.1186/1471-2164-16-s8-s6), 2015-06-18
Supplement: 1471-2164-16-S8-S6-S2.pdf [file 1471-2164-16-S8-S6-S2.pdf]

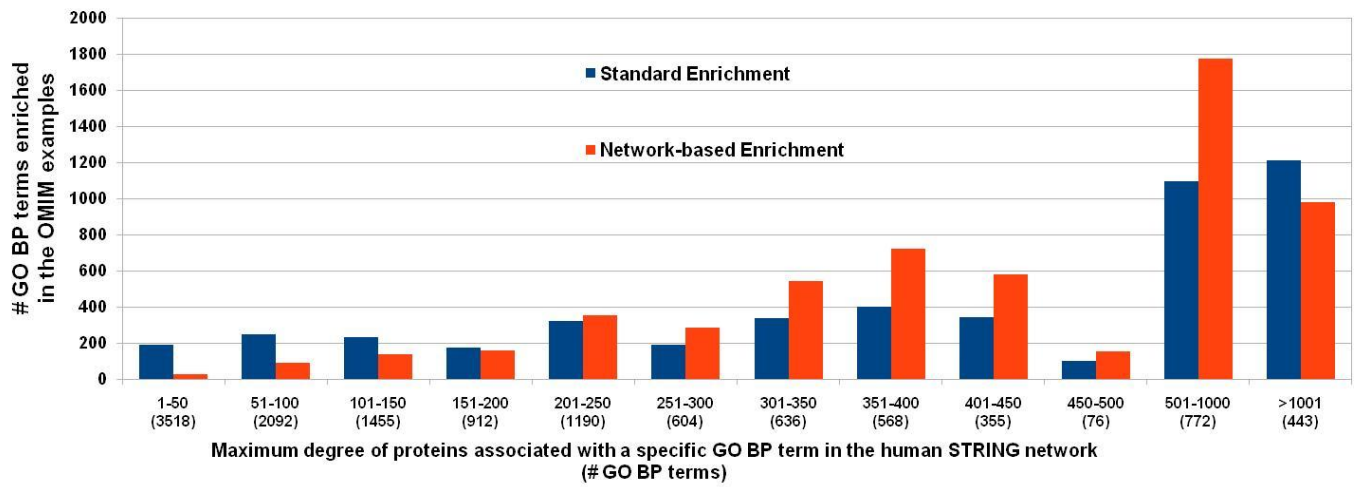

**Figure 1S- Number of enriched GO BP terms as a function of the maximum degree of the human proteins annotated with a the same term.**
